# Supplementary material
Source: Elsevier journal article supplement (https://authors.library.caltech.edu/35202/2/mmc1.pdf)
Supplement: mmc1 [file mmc1.pdf]

## **Appendix (Internet Repository) Sulfate extraction and analysis techniques**

**Sulfate extraction procedures.** Samples weighing between 30 and 100 g (most commonly 30-40g) were disaggregated and placed at the bottom of the glass beakers with 5vol% HCl in doubly deionized water so the sample/acid ratio was close to 1:10. The leaching solution was held at room temperature for 24 hours, and was stirred occasionally. Then, beakers were put in the hot cabinet held at 60°C for 2 hours and filtered through quantitative filter paper after that. This procedure leached all easily soluble compounds such as gypsum and carbonates, and the repeated leaching yielded no sulfate. In a few samples, carbonate cement dominated, and the solution bubbling occurred during the initial stages of acid addition. In these cases we waited for boiling to stop and added 10vol% HCl solution so the final solution was approximately at 5vol% HCl. Filtered solutions of ~250ml were placed in the same hot cabinet for evaporation, and BaCl<sub>2</sub> solution was added to them after the solutions were heated to slowly nucleate BaSO<sub>4</sub>, and then left evaporating in the hot cabinet at 85°C for 24 hours until 30-50% of the initial volume of the solution remained. After 24 hours, variable amounts of white powder of BaSO<sub>4</sub> were formed at the bottom of the beaker. An excess of BaCl<sub>2</sub> was added to the solution again and left in a hot cabinet for another 2-3 hours, followed by the removal of the beaker from the hot cabinet and letting it cool for another 2 hours. The white powder at the bottom of the beaker was quite dense and no additional precipitation occurred in solution after adding more BaCl<sub>2</sub>. BaSO<sub>4</sub> was then washed several times with deionized and then distilled water three times and then dried at 110°C. The sugar-white barite powder was collected from the bottom of each beaker and weighted. The proportion of SO<sub>4</sub> per one gram of sample was calculated (Table 1). Typically the described procedure generated between 4 and 100 mg of BaSO<sub>4</sub> for studied samples. Optical examination recorded that typical BaSO<sub>4</sub> sizes were 0.5-3 μm. XRD was performed on two powders, and confirmed that the white powder represented pure BaSO<sub>4</sub>.

The 24h+2h at 85°C leaching procedure was repeated with 0.5 g of ash samples at 1:10 dilution, and the solutions were analyzed by the quadrupole ICP-MS methods for concentrations of cations and anions, including concentration of sulfur and selenium at the Department of Environmental Analysis Center at Caltech following standard procedures (N.D. Dalleska, director). The concentration of sulfur determined this way correlated with those determined by the direct weighing the barite powder.

**Analysis.** Samples of barite weighing 4-8mg were loaded in the Ni-plug and reacted with BrF<sub>5</sub> using the CO<sub>2</sub> laser beam to release oxygen. Only short, one, three, and five minutes BrF<sub>5</sub> pretreatment were performed after sample chamber evacuation. This cleaned the sample chamber of any traces of residual water. Typically 4 to 8 unknown barite samples were run during each analytical session together with silicate and barite standards. Loading more samples is not recommended as the BaF<sub>2</sub> window gets clouded from below after about 7 samples are run. The Gore Mountain Garnet standard ( $\delta^{18}\text{O} = 5.75\%$ ) was run in the beginning of each day to ensure that the laser extraction line is yielding consistent results. During laser heating, most reaction occurs at low power, followed by boiling of the residue while increasing power to 10W that seems to generate no oxygen. Similar to observation of Bao et al. (2000), yellow liquid appears in the beginning of lasing but disappears after. The gentle laser power output increase is preferred to prevent sputtering and clouding the window.

The extracted oxygen passed through a series of cryogenic traps and hot mercury pump before been frozen into 3-5Å molecular sieve. The generated yield was determined using gas pressure in calibrated volume prior to freezing. This was done by the following procedure: weighted quantities of NBS127 and Aldrich barite standards were run and the generated oxygen was converted to CO<sub>2</sub> gas using carbon-rod converter. The amount of CO<sub>2</sub> corresponds to the O<sub>2</sub> but CO<sub>2</sub> gas is possible to freeze by liquid nitrogen in calibrated volume to determine quantity of gas in micromoles. The yields determined this way on barite standards were in 27-32% range, similar to yields obtained by Bao et al. (2000). The yields on the unknown barite samples were determined without conversion to CO<sub>2</sub> by registering the maximum pressure before freezing oxygen on a molecular sieve.

Such non-quantitative conversion implies that SOF<sub>2</sub> and/or SO<sub>2</sub>F<sub>2</sub> compounds form as byproducts of the reaction, as was determined by the mass scan on the mass spectrometer. The non-quantitative but consistent yields require correction to the isotopic measurements of O<sub>2</sub> based on the value of standards. We used three Barite standards of known isotopic composition to monitor yield- $\delta^{18}\text{O}_{\text{O}_2}$  relationship, and reproducibility: Baker Chemical, Aldrich, and NBS127. These samples were analyzed both as O<sub>2</sub> and CO<sub>2</sub> gas. The  $\delta^{18}\text{O}_{\text{O}_2}$  value of NBS127 barite standard ( $\delta^{18}\text{O}_{\text{O}_2} = 9.3\%$ , Gonfiantini et al. 1995) in the laser chamber is  $+0.1 \pm 0.2\%$ , n=10, implying that there is a consistent 9.2% offset between the accepted value

and non-quantitatively extracted O<sub>2</sub> in the laser chamber. The NBS127 standard run twice as O<sub>2</sub> gas yielded  $\Delta^{17}\text{O}=0.14\pm 0.12\text{‰}$ , and  $0.21\pm 0.11\text{‰}$ . For Baker-4 standard, the  $\delta^{18}\text{O}_{\text{O}_2}$  value measured by the thermal combustion technique is  $13.2\pm 0.3\text{‰}$ ,  $n=4$ , P. Shanks, personal communication, 2004). The O<sub>2</sub> gas extracted from this standard by laser fluorination and run as O<sub>2</sub> gas on Finnigan 253 yielded  $2.8\pm 0.5\text{‰}$  ( $n=3$ ),  $\Delta^{17}\text{O} = -0.05\pm 0.03\text{‰}$ . Thus, the offset in  $\delta^{18}\text{O}$  is  $10.4\text{‰}$ . For the third, Aldrich barite standard ( $\delta^{18}\text{O} = 8.17\text{‰}$ ) the  $\delta^{18}\text{O}$  value was  $-0.84\pm 0.2\text{‰}$  ( $n=6$ ) and  $\Delta^{17}\text{O}=0.01\pm 0.07\text{‰}$  ( $n=1$ ), thus the offset was  $9.0\text{‰}$ . Therefore, we accepted average  $9.4\text{‰}$  offset of our  $\delta^{18}\text{O}$  measurements, and this value is similar to the value used by Bao et al. (2000) in their measurements.

Zero enrichment measurements on Finnigan 253 mass spectrometer during five analytical sessions averaged  $-0.01\pm 0.02\text{‰}$  for  $\Delta^{17}\text{O}$ , but the uncertainty on individual zero enrichment measurements averaged  $\pm 0.06\text{‰}$ . Other silicate and oxide standards and materials were run in the same sample plug with barite samples during several analytical sessions. They yielded  $\Delta^{17}\text{O}$  values near zero: Gore Mountain Garnet ( $\delta^{18}\text{O}=5.7\text{‰}$ ,  $\Delta^{17}\text{O}=0.15\pm 0.10$ ,  $n=3$ ), San Carlos Olivine ( $\delta^{18}\text{O}=4.9\text{‰}$ ,  $\Delta^{17}\text{O}=0.05\pm 0.10$ ,  $n=1$ ), synthetic aluminum oxide ( $\delta^{18}\text{O} = 15.2\text{‰}$ ,  $\Delta^{17}\text{O}=0.04\pm 0.10\text{‰}$ ,  $n=2$ ), synthetic SiO<sub>2</sub> ( $\delta^{18}\text{O} = 23.95\text{‰}$ ,  $\Delta^{17}\text{O}=0.17\pm 0.09\text{‰}$ ,  $n=1$ ). Slight deviations in  $\delta^{18}\text{O}$  and  $\Delta^{17}\text{O}$  values are likely due to the low- $\delta^{18}\text{O}$ , high- $\Delta^{17}\text{O}$  blank from adjacent barite samples, but it produces no effect on our interpretation, because the measured  $\delta^{18}\text{O}$  and  $\Delta^{17}\text{O}$  ranges in barite are  $30\text{‰}$ , and  $3.5\text{‰}$  respectively (Table 1). However, we do not assign mass-independent significance to  $\Delta^{17}\text{O}$  value  $<0.20\text{‰}$ .

Rare Sulfur isotopic measurements. Purified powders of BaSO<sub>4</sub> were converted to Ag<sub>2</sub>S following published techniques (Thode et al. 1961; Forrest and Newman, 1977; Farquhar et al. 2000). Barium sulfate powders (~1-10 mg) were placed in boiling flasks with ~25 ml of purified 'Thode' solution (500 ml HI, 816 ml concentrated HCl, 245 ml ~50 % H<sub>3</sub>PO<sub>4</sub>; Thode *et al.* 1961). The mixture was gently boiled for ~3 hours. A stream of N<sub>2</sub> gas carried evolved H<sub>2</sub>S through a condenser and a milli-Q water trap before a trapping solution containing cadmium acetate absorbed the H<sub>2</sub>S. The resulting CdS was converted to Ag<sub>2</sub>S by adding ~5-10 drops of an ~0.1M silver nitrate solution to the trapping solution. The Ag<sub>2</sub>S was filtered, washed (~150 ml deionized distilled water, ~10 ml 1M NH<sub>4</sub>OH, ~150 ml deionized distilled water), and oven dried overnight at ~90°C.

Sulfur isotope analyses largely followed published methods (Hulston and Thode, 1965; Gao and Thiemens, 1991; Farquhar et al. 2000; Johnston et al. 2005). Silver sulfide powders (~1-3 mg) were weighed into small Al foil pouches and loaded into externally-heated Ni bombs. The bombs were evacuated for ~1-2 hours, cooled with liquid N<sub>2</sub>, and filled with purified F<sub>2</sub> in stoichiometric excess of that required for complete reaction of Ag<sub>2</sub>S. The bombs were then heated to 270°C and held at temperature overnight. The SF<sub>6</sub> produced during this process was frozen into a U- trap cooled by liquid N<sub>2</sub> (-196°C), and non-condensable gaseous fluorine compounds were pacivated over a column of KBr held at 100°C. The trap was then warmed in an ethanol slush (~ -120°C) to separate the SF<sub>6</sub> from condensable impurities. The expanded SF<sub>6</sub> was frozen into the injection loop of a gas chromatograph (GC) and then carried by a He gas flow (~10 ml/min) through a composite GC column (6' - 1/8" Mol Sieve 5A column followed by a 12' - 1/8" HayeSep Q column) held at 50 °C. After SF<sub>6</sub> passed through the GC, the composite column was heated to 150°C and backflushed with He for ~20 minutes to avoid co-elution of contaminating compounds and later SF<sub>6</sub> samples. Purified SF<sub>6</sub> was introduced to a ThermoFinnigan MAT 253 dual-inlet gas-source mass spectrometer where sulfur isotope abundances were measured by monitoring the <sup>32</sup>SF<sub>5</sub><sup>+</sup>, <sup>33</sup>SF<sub>5</sub><sup>+</sup>, <sup>34</sup>SF<sub>5</sub><sup>+</sup>, and <sup>36</sup>SF<sub>5</sub><sup>+</sup> ion beams at  $m/z = 127, 128, 129, \text{ and } 131$ , respectively. Uncertainties associated with the sulfur isotopic measurements ( $0.07 \text{‰}$  for  $^{34}\text{S}$ ,  $0.006 \text{‰}$  for  $\Delta^{33}\text{S}$ , and  $0.2\text{‰}$  for  $\Delta^{36}\text{S}$ ) are taken as the standard deviation associated with long-term repeat analyses ( $n = 26$ ) of three International Atomic Energy Association silver sulfide standards.

Nitrate contamination check. We dissolved precipitated barite in DTPA agent: diethylene-triamine-penta-acetic acid [(HO<sub>2</sub>CCH<sub>2</sub>)<sub>2</sub>NCH<sub>2</sub>CH<sub>2</sub>]<sub>2</sub>NCH<sub>2</sub>CO<sub>2</sub>H]. The DTPA solution used for barite dissolution consisted of 0.05 M DTPA (98%) in a 1M NaOH solution. The generated solutions were diluted 100 times and run on an ion chromatograph at the Department of Chemistry, University of Oregon with the assistance of Prof. Paul Engelking. For the majority of samples nitrate concentration did not exceed 2%, and there is no correlation of measured  $\Delta^{17}\text{O}$  with NO<sub>3</sub> present; for example Pinatubo samples with the highest NO<sub>3</sub> concentration of 3.6% have  $\Delta^{17}\text{O}$  near zero.
